# Supplementary material for: Quercetin@Gd3+ doped Prussian blue nanocubes induce the pyroptotic death of MDA-MB-231 cells: combinational targeted multimodal therapy, dual modal MRI, intuitive modelling of r1–r2 relaxivities
Source: Royal Society of Chemistry journal article supplement (doi:10.1039/d3tb00316g), 2023-01-01
Supplement: d3tb00316g1.pdf [file d3tb00316g1.pdf]

## Electronic Supporting Information

### Quercetin@Gd<sup>3+</sup> doped Prussian blue nanocube induces pyroptotic death of MDA-MB-231 cells: combinational targeted multimodal therapy, dual modal MRI, intuitive modelling of $T_1$ - $T_2$ relaxivities

Panchanan Sahoo<sup>†,‡</sup>, Pulak Jana<sup>§,†</sup>, Sudip Kundu<sup>†</sup>, Snehasis Mishra<sup>†</sup>, Krishnananda Chattopadhyay<sup>§</sup>, Abhishek Mukherjee<sup>#,‡</sup>, Chandan Kumar Ghosh<sup>\*,†</sup>

<sup>†</sup>School of Materials Science and Nanotechnology, Jadavpur University, Kolkata-700032, India

<sup>‡</sup>Agricultural and Ecological Research Unit, Biological Science Division, Indian Statistical Institute, Giridih, Jharkhand, India

<sup>§</sup>Structural Biology & Bio-Informatics Division, CSIR-Indian Institute of Chemical Biology, 4, Raja S. C. Mallick Road, Kolkata 700032, India

<sup>#</sup>Academy of Scientific and Innovative Research (AcSIR), Ghaziabad, Uttar Pradesh-201002, India

#### Calculation of the photothermal conversion efficiency:

One of the most extensively used equation to determine photothermal conversion efficiency of PB, GPB and GPBA nanocubes (NC) under 808 nm (5.26 W·cm<sup>-2</sup>, total power 1 W) laser irradiation is described as follows:<sup>1,2</sup>

$$\eta = \frac{hA(T_{max} - T_{sur}) - Q_w}{I(1 - 10^{-A_{808}})} \quad (S1)$$

Where h and A are the heat transfer coefficient and surface area of the quartz cuvette in which aqueous solution of the NC samples have been exposed under irradiation;  $T_{max}$  is steady state temperature of the NC aqueous solution;  $T_{sur}$  is the surrounding temperature;  $Q_w$  is associated with the converted energy by quartz cuvette contained only aqueous solution from radiant energy which is determined to be 8.4 mW; I is the power of incident NIR laser beam and  $A_{808}$  is the absorbance of the particular NC sample at a wavelength of 808 nm.

Herein, to find out hA value, a dimensionless force temperature ( $\theta$ ) has been introduced which is associated with the  $T_{max}$ .

$$\theta = \frac{T - T_{sur}}{T_{max} - T_{sur}} \quad (S2)$$

And another parameter known as time constant related to the NC sample is defined as

$$\tau_s = \frac{\sum_i m_i c_{pi}}{hA} \quad (S3)$$

Where,  $\sum_i m_i c_{pi}$  is the product of mass and heat capacity of quartz cuvette, NC sample and solvent in the system. Thus,  $\tau_s$  can be calculated from the following equation by considering cooling period of the solution:

$$t = -\tau_s \ln\theta \quad (S4)$$

Then,  $\eta$  can be intended after findings  $hA$  value followed by equation S1.

Figure S4(a-e) represents linear plot between cooling period (t) and  $-\ln\theta$  with slope  $\tau_s$  to be 562.46, 585.47, 557.09, 608.43 and 688.59 s corresponding to PB, GPB<sub>0.25</sub>, GPB<sub>0.5</sub>, GPB<sub>0.75</sub> and GPBA respectively. Finally, photothermal conversion efficiency is calculated to be 33.85, 51.25, 65.56, 51.45 and 35.49% respectively.

**Table S1:** Feeding amounts of reactants during synthesis in Solution A

| Sample Name         | FeCl <sub>3</sub> .6H <sub>2</sub> O (mmol) | Gd(NO <sub>3</sub> ) <sub>3</sub> .6H <sub>2</sub> O (mmol) |
|---------------------|---------------------------------------------|-------------------------------------------------------------|
| PB                  | 0.0198                                      | 0.00                                                        |
| GPB <sub>0.25</sub> | 0.0148                                      | 0.0049                                                      |
| GPB <sub>0.50</sub> | 0.0099                                      | 0.0099                                                      |
| GPB <sub>0.75</sub> | 0.0049                                      | 0.0148                                                      |
| GPBA                | 0.00                                        | 0.0198                                                      |

**Table S2:** Variation in the occupancy probability of the different atoms in the unit cell structure of PB, GPB and GPBA as obtained by Rietveld analysis using the Maud software

| Atom             | site | PB, R <sub>p</sub> =18.68, R <sub>wp</sub> =15.71 |                      | GPB <sub>0.25</sub> , R <sub>p</sub> =16.55, R <sub>wp</sub> =13.42 |                       |
|------------------|------|---------------------------------------------------|----------------------|---------------------------------------------------------------------|-----------------------|
|                  |      | Position (x)                                      | Occupancy            | Position (x)                                                        | Occupancy             |
| Fe <sup>3+</sup> | 1a   | 0.0                                               | 1.0                  | 0.0                                                                 | 0.7732842(20)         |
|                  | 3c   | 0.0                                               | 1.0                  | 0.0                                                                 | 0.9133229(8)          |
| Fe <sup>2+</sup> | 1b   | 0.50486345(9)                                     | <b>0.6592583(21)</b> | 0.5                                                                 | <b>0.75717217(23)</b> |
|                  | 3d   | 0.5002564(13)                                     | 0.7803208(17)        | 0.5                                                                 | 0.8512476(11)         |
| N                | 6e   | 0.20095892(5)                                     | 0.7803186(23)        | 0.21973883(21)                                                      | 0.6524139(17)         |

|                  |     |                |               |                |                |
|------------------|-----|----------------|---------------|----------------|----------------|
|                  | 6f  | 0.20777132(6)  | 0.6590573(8)  | 0.19607785(19) | 0.68172204(26) |
|                  | 12h | 0.3086982(18)  | 0.7803359(19) | 0.29398748(9)  | 0.7618029(9)   |
| C                | 6e  | 0.31160247(2)  | 0.7803157(12) | 0.2527187(13)  | 0.7553462(21)  |
|                  | 6f  | 0.2108135(8)   | 0.6592680(10) | 0.3369625(17)  | 0.5803227(25)  |
|                  | 12h | 0.19350913(21) | 0.7803082(13) | 0.24345358(7)  | 0.8885231(11)  |
| O                | 6e  | 0.20546116(6)  | 0.2196236(24) | 0.28894728(15) | 0.20116886(13) |
|                  | 6f  | 0.31103197(8)  | 0.3418713(15) | 0.19607785(8)  | 0.3532405(20)  |
|                  | 12h | 0.21343586(11) | 0.2196520(17) | 0.2519634(13)  | 0.19178203(6)  |
| O                | 8g  | 0.28311816(7)  | 0.9769835(23) | 0.24846497(4)  | 1.0557612(3)   |
| Gd <sup>3+</sup> | 1a  | 0.0            |               | 0.0            | 0.2878626(8)   |
|                  | 3c  | 0.0            |               | 0.0            | 0.024392676(3) |

| Atom             | site | GPB <sub>0.50</sub> , R <sub>p</sub> =18.01, R <sub>wp</sub> =16.70 |                     | GPB <sub>0.75</sub> , R <sub>p</sub> =15.01, R <sub>wp</sub> =12.36 |                     |
|------------------|------|---------------------------------------------------------------------|---------------------|---------------------------------------------------------------------|---------------------|
|                  |      | Position (x)                                                        | Occupancy           | Position (x)                                                        | Occupancy           |
| Fe <sup>3+</sup> | 1a   | 0.0                                                                 | 0.19958599(6)       | 0.0                                                                 | 0.04379456(3)       |
|                  | 3c   | 0.0                                                                 | 0.6955486(7)        | 0.0                                                                 | 0.22820742(4)       |
| Fe <sup>2+</sup> | 1b   | 0.5                                                                 | <b>0.8748906(7)</b> | 0.5                                                                 | <b>0.8925268(5)</b> |
|                  | 3d   | 0.5                                                                 | 0.72967404(6)       | 0.5                                                                 | 0.6744579(10)       |
| N                | 6e   | 0.24126482(11)                                                      | 0.29024577(8)       | 0.22482389(5)                                                       | 0.34185156(28)      |
|                  | 6f   | 0.22089453(8)                                                       | 0.87297755(11)      | 0.20800404(2)                                                       | 0.935618(11)        |
|                  | 12h  | 0.2812284(9)                                                        | 0.7125842(7)        | 0.29865497(1)                                                       | 0.83086663(13)      |
| C                | 6e   | 0.28790888(17)                                                      | 0.711003(9)         | 0.23690972(1)                                                       | 0.96722984(22)      |
|                  | 6f   | 0.3432895(12)                                                       | 0.8710056(7)        | 0.3080017(2)                                                        | 0.96336(15)         |
|                  | 12h  | 0.17622626(8)                                                       | 0.7115617(6)        | 0.19111414(1)                                                       | 0.93343514(14)      |
| O                | 6e   | 0.26116607(16)                                                      | 0.29032323(6)       | 0.22464009(3)                                                       | 0.36714977(9)       |
|                  | 6f   | 0.21971194(21)                                                      | 0.13004822(4)       | 0.2045692(3)                                                        | 0.083756045(7)      |
|                  | 12h  | 0.2779372(7)                                                        | 0.2905587(4)        | 0.2578505(1)                                                        | 0.36965746(6)       |
| O                | 8g   | 0.27506152(13)                                                      | 0.98139584(8)       | 0.27008986(1)                                                       | 0.9853173(17)       |
| Gd <sup>3+</sup> | 1a   | 0.0                                                                 | 0.7909804(8)        | 0.0                                                                 | 0.8079837(13)       |
|                  | 3c   | 0.0                                                                 | 0.29800105(2)       | 0.0                                                                 | 0.60148686(9)       |
|                  | 3c   | 0.0                                                                 | 0.29800105(2)       | 0.0                                                                 | 0.60148686(9)       |

| Atom | site | GPBA, R <sub>p</sub> =11.75, R <sub>wp</sub> =14.95 |           |
|------|------|-----------------------------------------------------|-----------|
|      |      | Position (x)                                        | Occupancy |
|      |      |                                                     |           |

|                  |     |             |                      |
|------------------|-----|-------------|----------------------|
| Gd <sup>3+</sup> | 1a  | 0.0         | 1                    |
|                  | 3c  | 0.0         | 1                    |
| Fe <sup>2+</sup> | 1b  | 0.5         | <b>0.40191638(8)</b> |
|                  | 3d  | 0.5         | 0.8972872(5)         |
| N                | 6e  | 0.28806(14) | 0.8323061(12)        |
|                  | 6f  | 0.43577(17) | 0.31923234(17)       |
|                  | 12h | 0.3258(7)   | 0.9944583(14)        |
| C                | 6e  | 0.27169(21) | 0.9518085(8)         |
|                  | 6f  | 0.43577(4)  | 0.37184647(2)        |
|                  | 12h | 0.19898(6)  | 0.878701(3)          |
| O                | 6e  | 0.57235(11) | 0.1460648(6)         |
|                  | 6f  | 0.43577(14) | 0.6850089(12)        |
|                  | 12h | 0.86476(9)  | 0.17641485(15)       |
| O                | 8g  | 0.28206(3)  | 0.97429556(4)        |

**Table S3:** Elemental analysis as obtained from FESEM-EDX measurement

| Sample              | at% of Fe | at% of Gd | at% of N |
|---------------------|-----------|-----------|----------|
| GPB <sub>0.25</sub> | 28.60     | 0.05      | 42.67    |
| GPB <sub>0.50</sub> | 23.47     | 0.35      | 52.19    |
| GPB <sub>0.75</sub> | 12.81     | 0.43      | 73.31    |
| GPBA                | 10.81     | 1.21      | 66.37    |

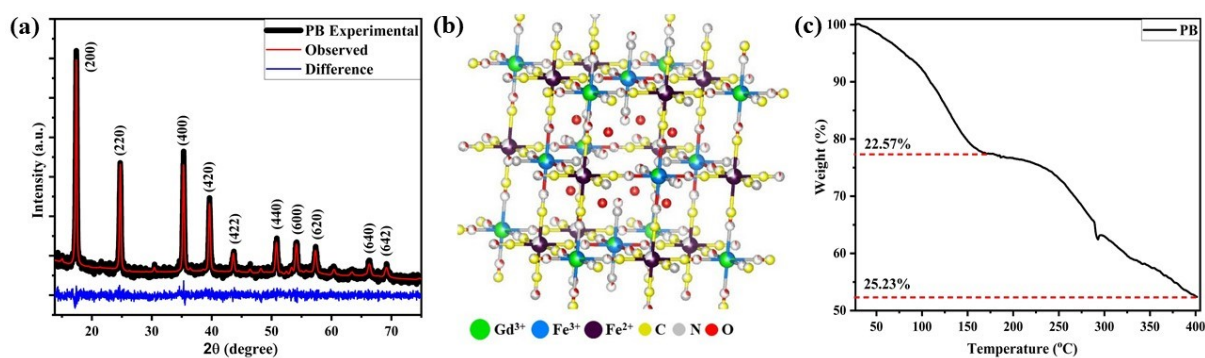

**Fig. S1:** (a) Reitveld refinement of PB XRD pattern with difference between experimental and refined patterns. (b) Unit cell structure of representative GPB<sub>0.50</sub> nanocube. (c) TGA plot of PB.

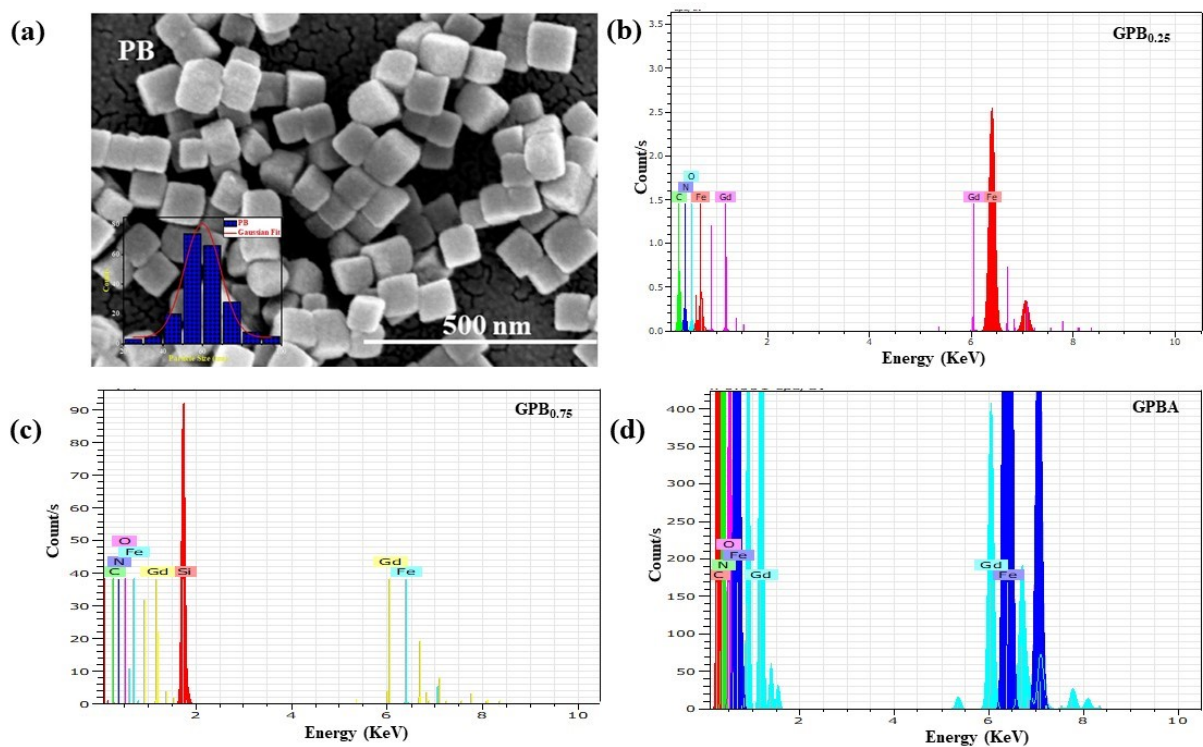

**Fig. S2:** (a) FESEM image and size distribution histogram in the inset of PB nanocubes. EDX spectrum of (b) GPB<sub>0.25</sub>, (c) GPB<sub>0.50</sub> and (d) GPBA nanocubes.

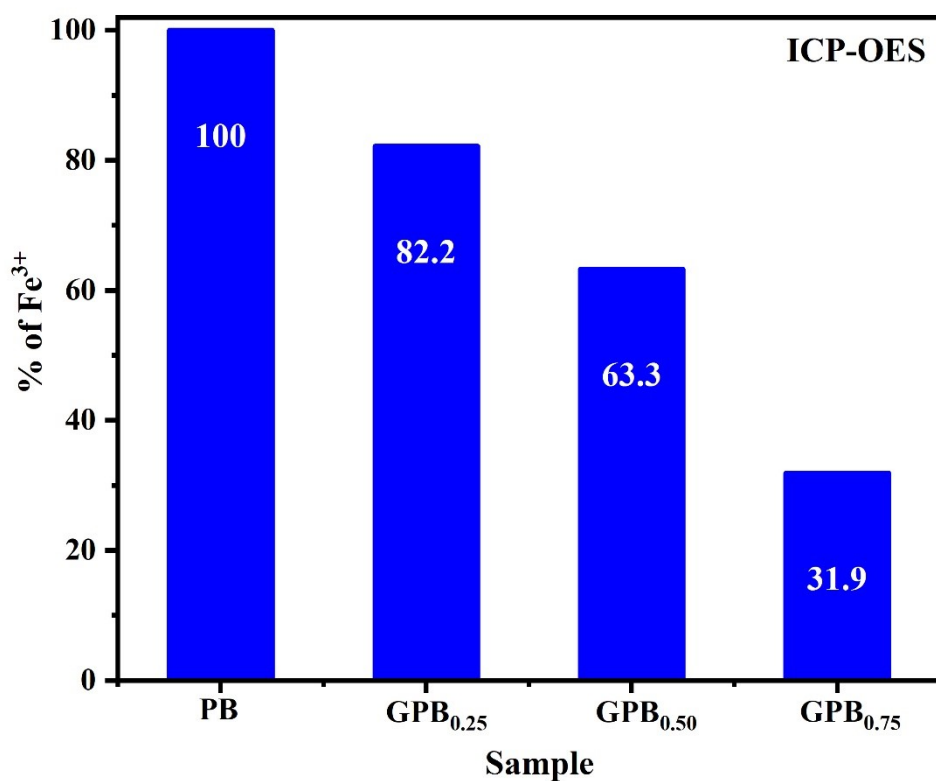

**Fig. S3:** ICP-OES measurement to find percentage Fe<sup>3+</sup> content in bare PB and GPB samples (initial concentration of exposed samples was 40 µg/mL).



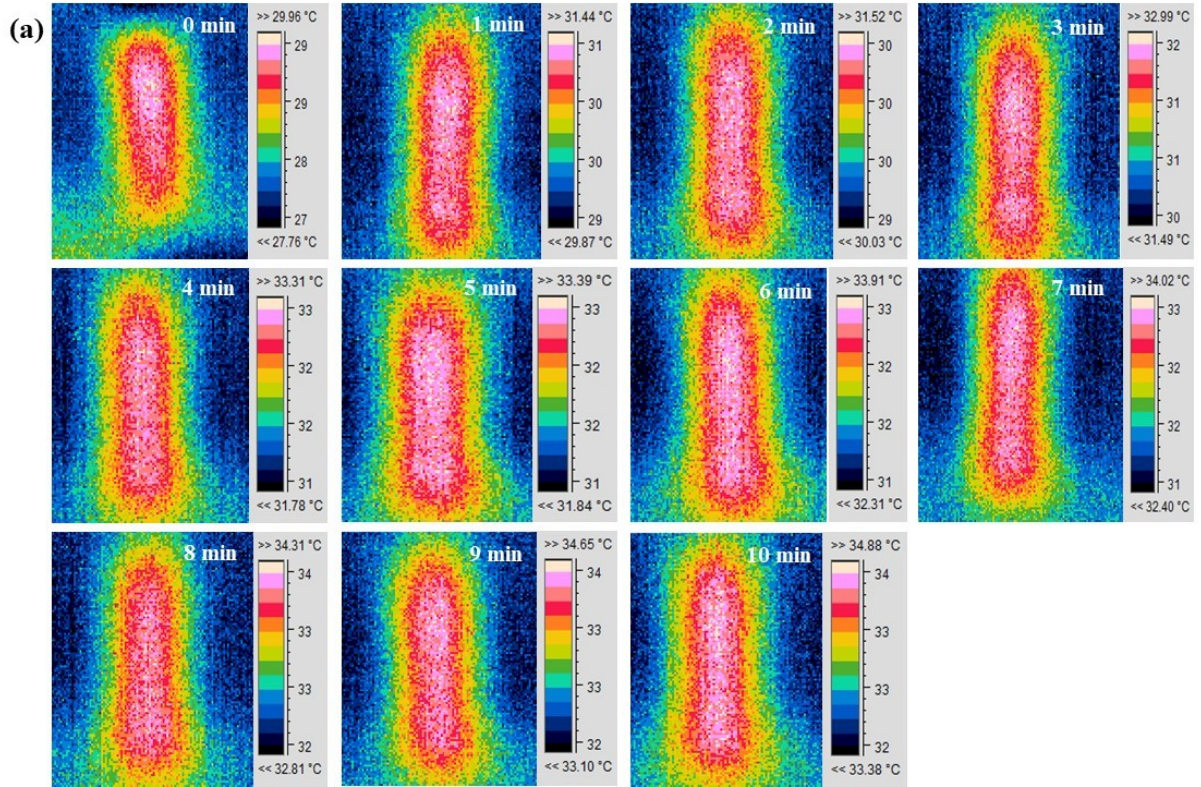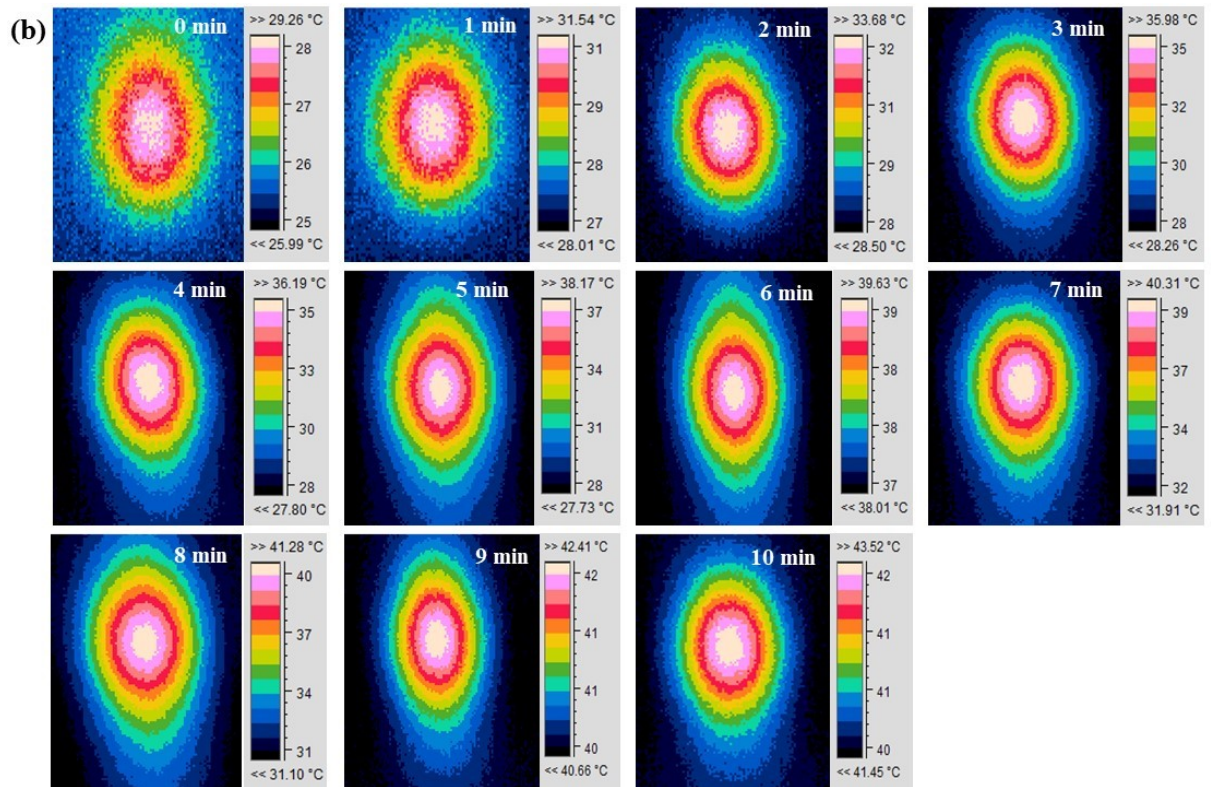



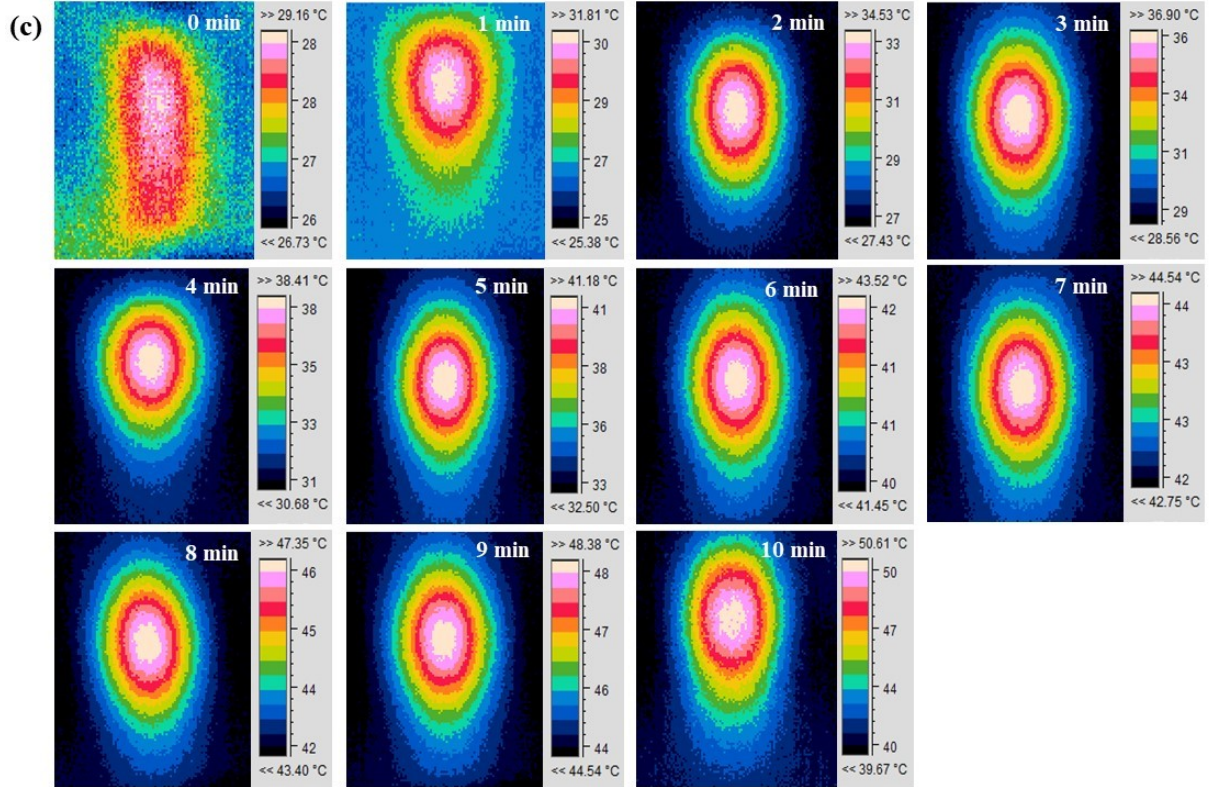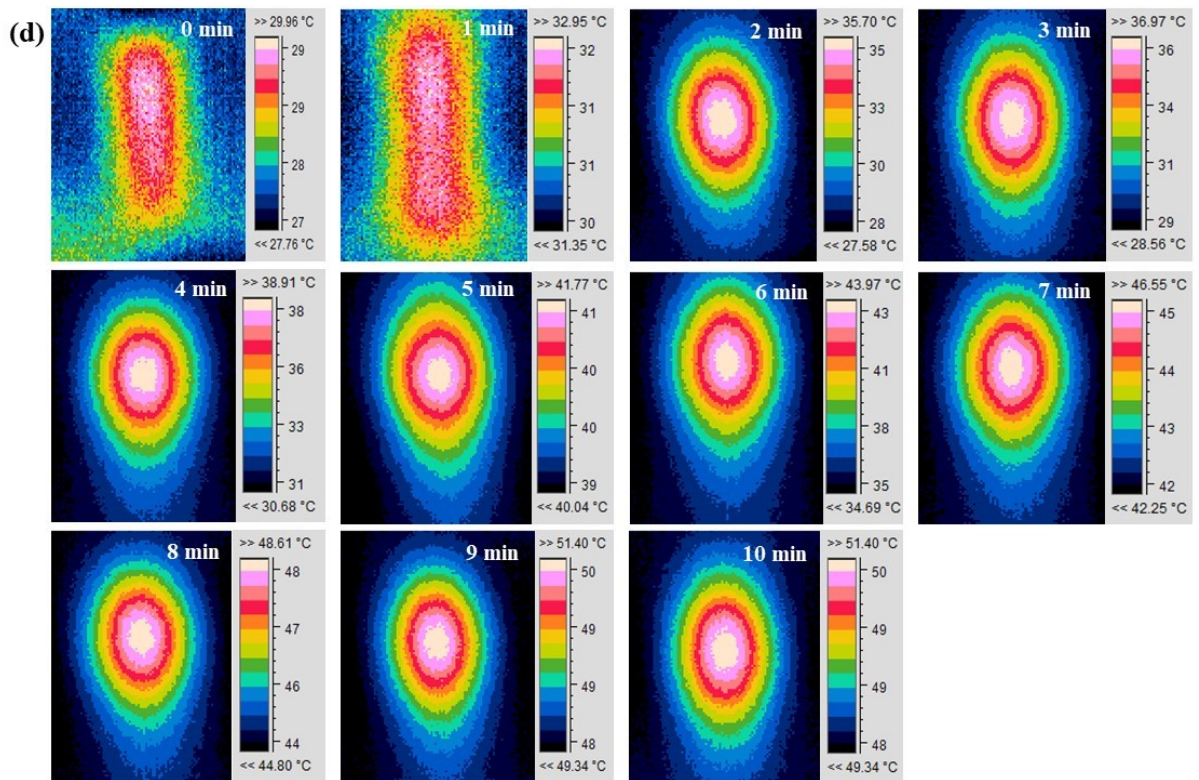

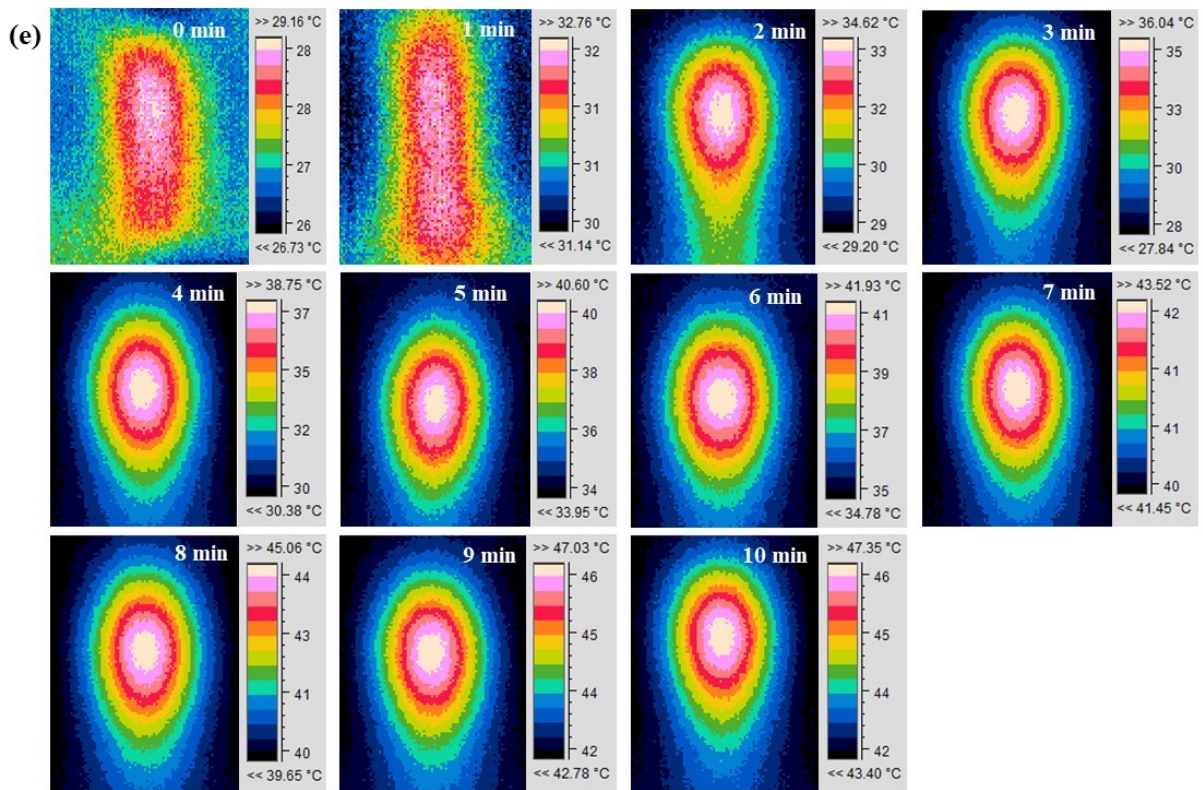

**Fig. S4:** Thermographs of (a) DI, (b) PB, (c) GPB<sub>0.25</sub>, (d) GPB<sub>0.75</sub>, (e) GPBA nanocubes sample under 808 nm NIR laser irradiation over 10 minutes.

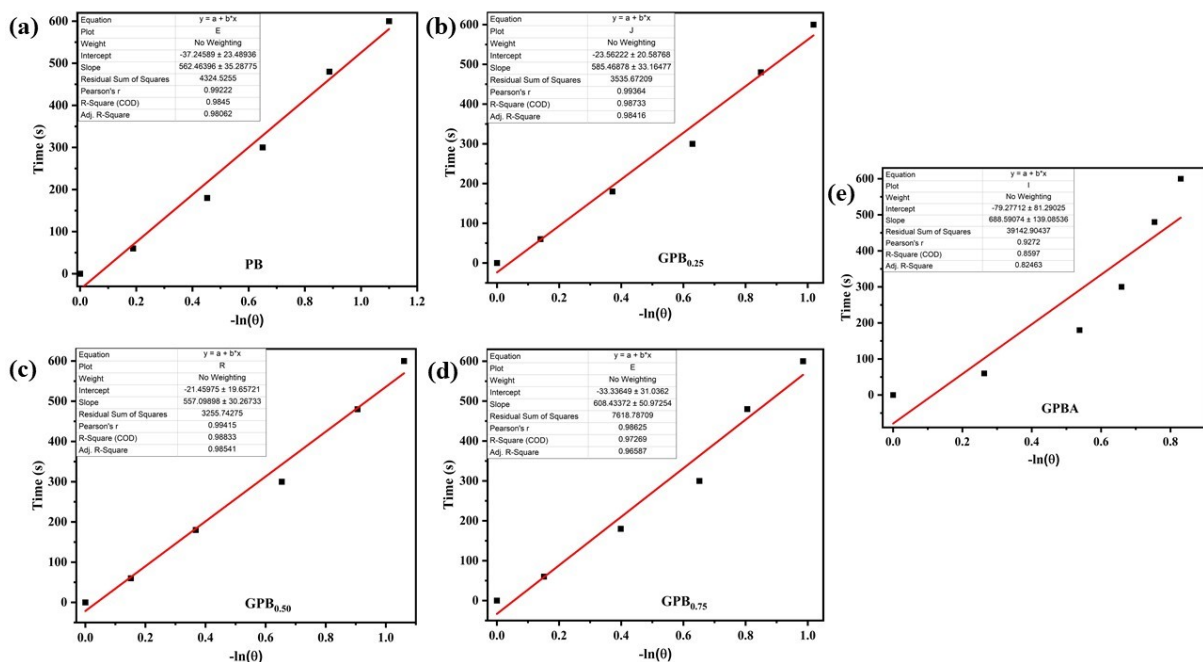

**Fig. S5:** Plot and linear fit of time versus negative natural logarithm of the temperature



increment for the cooling rate of (a) PB, (b)  $\text{GPB}_{0.25}$ , (c)  $\text{GPB}_{0.50}$ , (d)  $\text{GPB}_{0.75}$  and (e) GPBA under 808 nm laser.

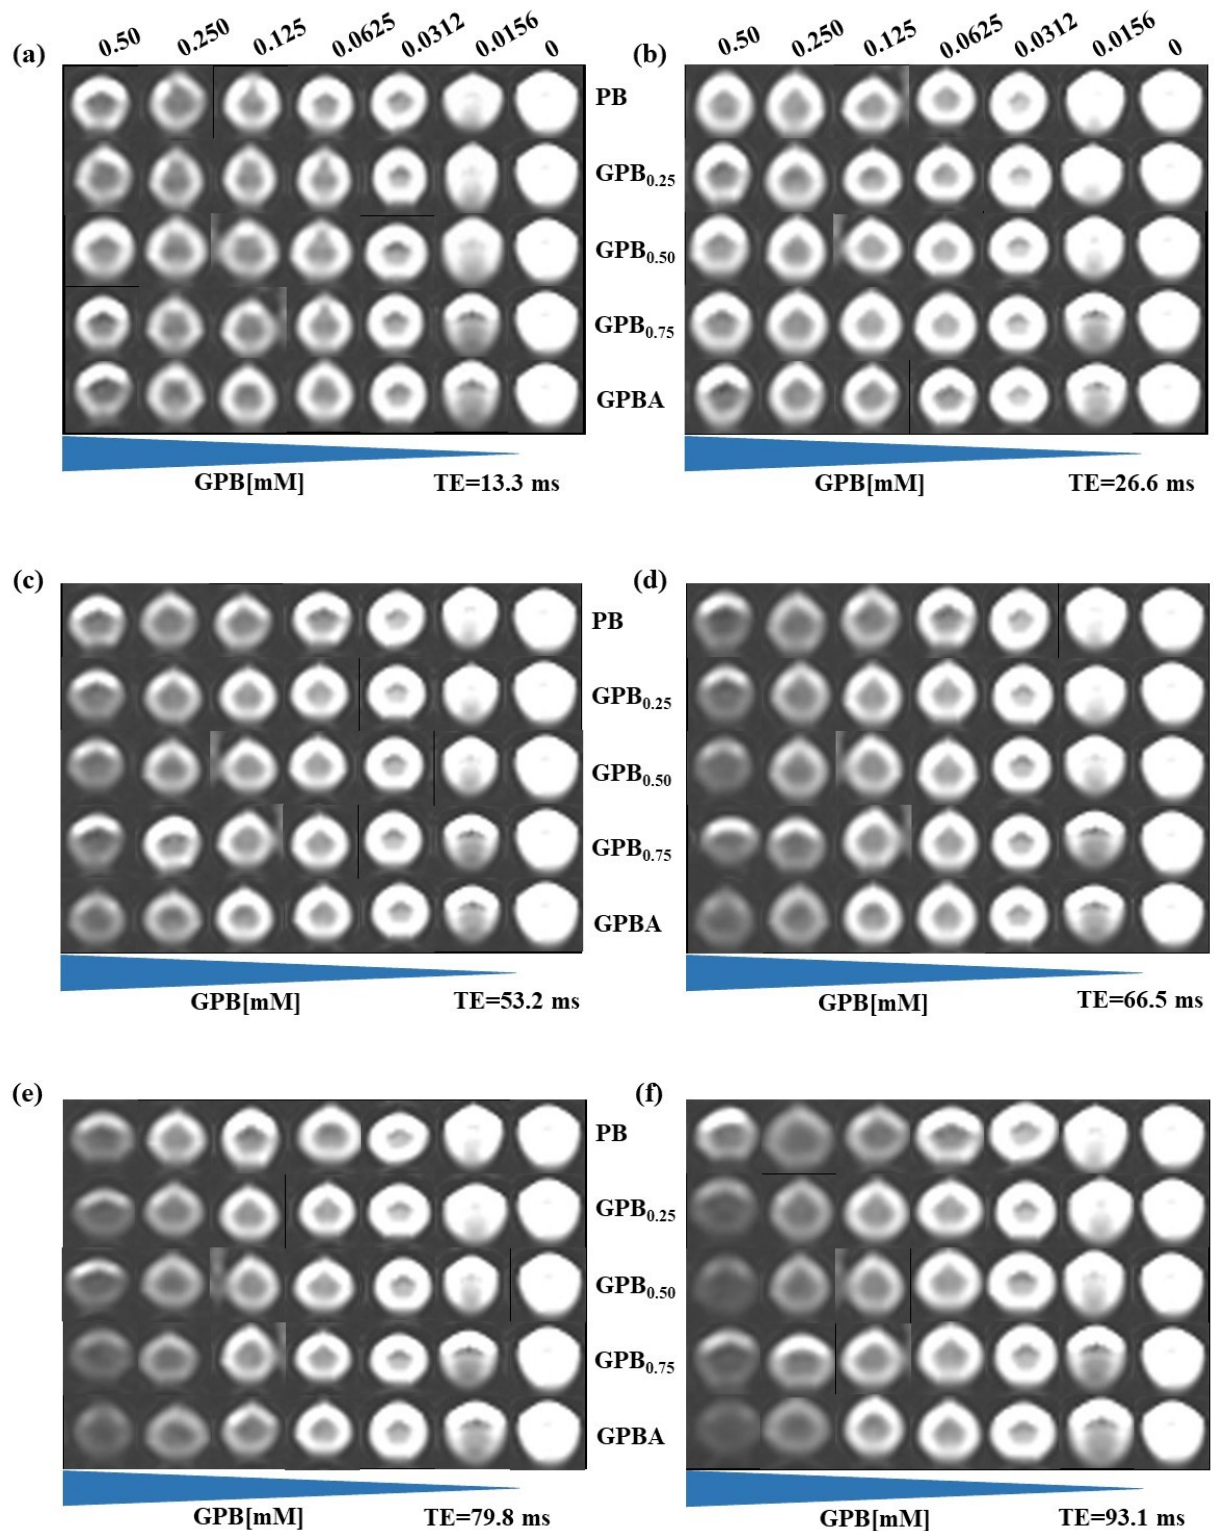

**Fig. S6:** Concentration dependant  $T_2$  weighted MR images at 3 T showing hypo intensity from PB,  $\text{GPB}_{0.25}$ ,  $\text{GPB}_{0.50}$ ,  $\text{GPB}_{0.75}$  and GPBA using spin-echo sequences with TR: 1770 ms

and variable TE of (a) 13.3 ms, (b) 26.6 ms, (c) 53.2 ms, (d) 66.5 ms, (e) 79.8 ms and (f) 93.1 ms.

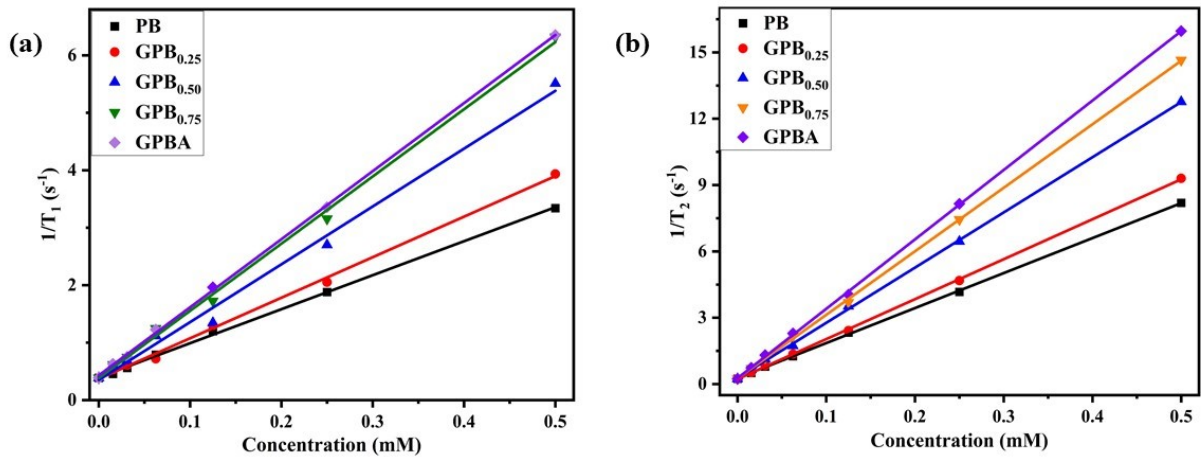

**Fig. S7:** Concentration dependent (a)  $T_1$  and (b)  $T_2$  relaxation rates. The relaxivities values were determined to be  $r_1 \sim 5.91, 7.05, 10.06, 11.69, 11.84 \text{ mM}^{-1}\text{s}^{-1}$  and  $r_2 \sim 15.82, 18.07, 24.96, 28.72, 31.39 \text{ mM}^{-1}\text{s}^{-1}$ .

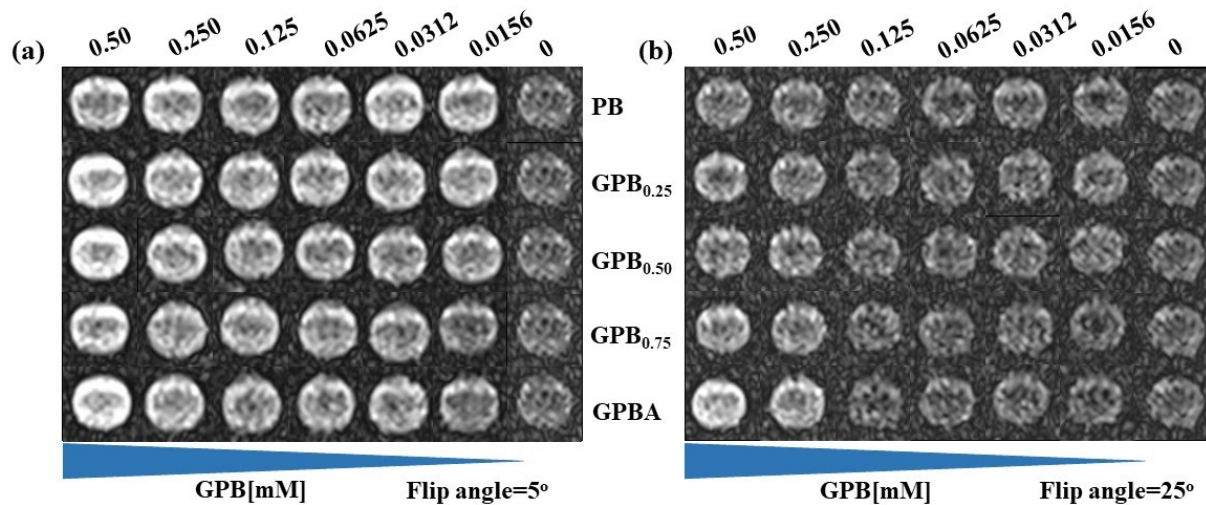

**Fig. S8:** Concentration dependant  $T_1$  weighted MR images at 3 T showing brightening effect from PB, GPB<sub>0.25</sub>, GPB<sub>0.50</sub>, GPB<sub>0.75</sub> and GPBA using 3D gradient spin-echo sequences with TR: 15 ms, TE: 2.71 ms and variable flip angle of (a)  $5^\circ$  and (b)  $25^\circ$ .

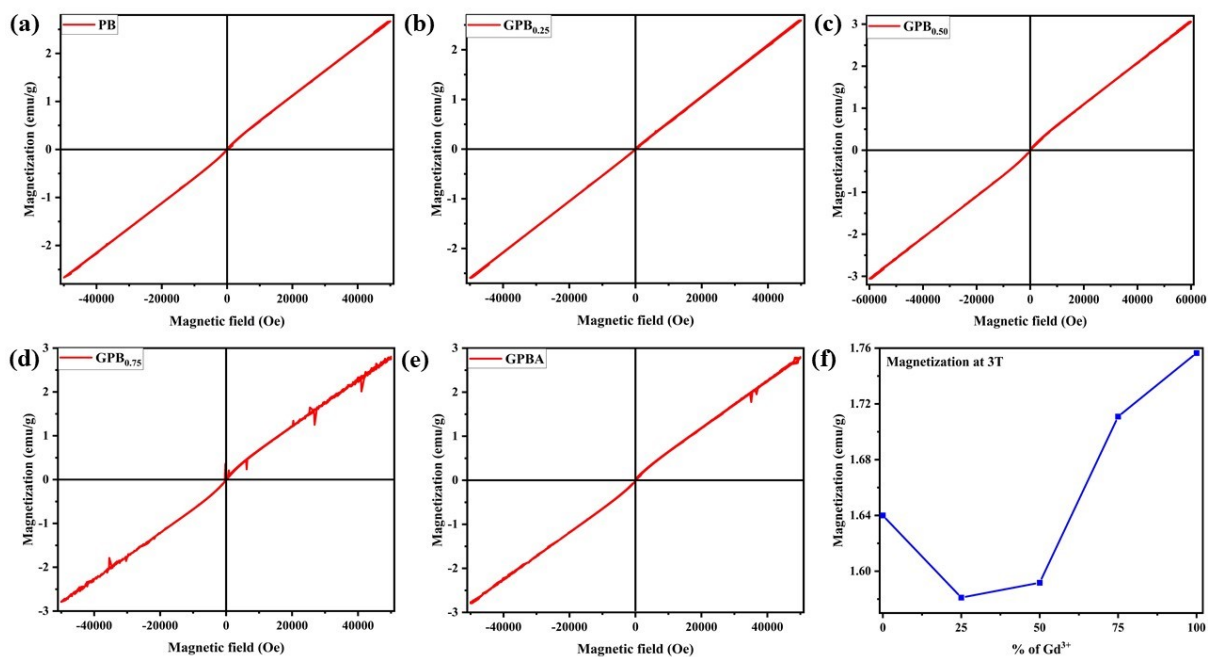

**Fig. S9:** SQUID magnetometry. Isothermal magnetization as a function of field at 300 K for (a) PB, (b)  $GPB_{0.25}$ , (c)  $GPB_{0.50}$ , (d)  $GPB_{0.75}$  and (e) GPBA nanocubes sample. (f) Magnetization at 3T as a function of different  $Gd^{3+}$  doping in PB nanocubes at 300 K.

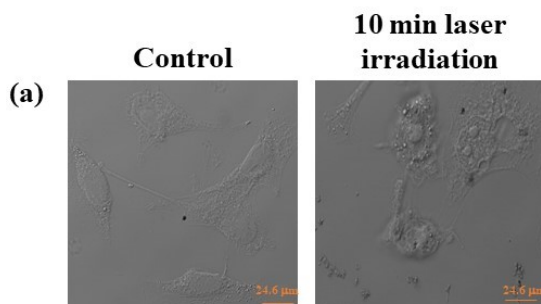

**Fig. S10:** (a) CLSM bright field image showing the induction of cell membrane disruption and nuclear condensation by  $GPB_{0.50}@PDA@PEG@HA@Qu$  under 10 minute laser exposure in MDA-MB-231 cells.



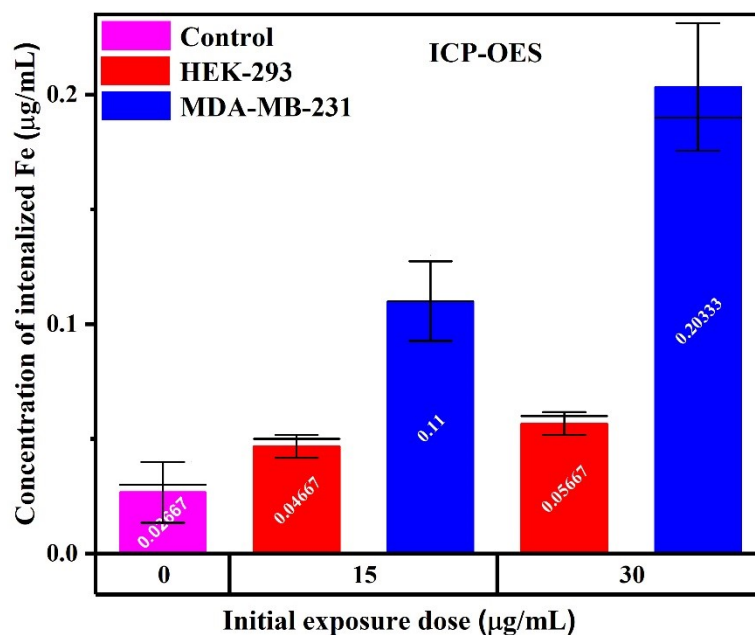

**Fig. S11:** ICP-OES analysis to quantify Fe uptake in HEK 293 and MDA-MB-231 cell. After 24 hr of incubation with 15 and 30 µg/mL of the GPB<sub>0.50</sub>@PDA@PEG@HA nanocomposite, HEK 293 and MDA-MB-231 cell pellets were collected and acid digested for measurement.

### Supporting information references.

1. K. C. Li, H. C. Chu, Y. Lin, H. Y. Tuan and Y. C. Hu, *ACS applied materials & interfaces*, 2016, **8**, 12082-12090.
2. Z. H. Li, Y. Chen, Y. Sun and X. Z. Zhang, *ACS nano*, 2021, **15**, 5189-5200.
